# Supplementary material for: Physical mechanisms driving the reversible aggregation of Staphylococcus aureus and response to antimicrobials
Source: PubMed Central journal article supplement (PMC8298462; doi:10.1038/s41598-021-94457-1), 2021-07-22
Supplement: 41598_2021_94457_MOESM1_ESM.pdf [file 41598_2021_94457_MOESM1_ESM.pdf]

# Supplementary information

## Physical mechanisms driving the reversible aggregation of *Staphylococcus aureus* and response to antimicrobials.

Céline Burel<sup>1\*</sup>, Rémi Dreyfus<sup>1</sup> and Laura Purevdorj-Gage<sup>2</sup>

<sup>1</sup>Complex Assemblies of Soft Matter Laboratory (COMPASS), IRL 3254, CNRS-Solvay-University of Pennsylvania, CRTB, Bristol, PA 19007, United States

<sup>2</sup>Solvay, Novacare CRTB, Bristol, PA 19007, United States

\*Correspondence to: Celine Burel, COMPASS, SOLVAY, 350 George Patterson Boulevard, Bristol 19007, PA, USA. E-mail: celine.burel@solvay.com

### Frequency and distribution of aggregates

To monitor changes in the evolution of frequency and distribution of aggregates in a sample population, the number of small (“ $N_{\text{Agg}48}$ ”: number of aggregates of size between 4 and 8  $\mu\text{m}$ ) and larger (“ $N_{\text{Agg}8}$ ”: number of aggregates of size above 8  $\mu\text{m}$ ) aggregates per  $10^3$  bacteria cells were also quantified across the same pH range. In each medium, significant evolution of both  $N_{\text{Agg}8}$  and  $N_{\text{Agg}48}$  were observed as pH decreased below  $\text{pH}_{\text{Agg}}$ .  $N_{\text{Agg}8}$  continuously increases until pH reached about 3.2 whereas  $N_{\text{Agg}48}$  reached a maximum at a less acidic pH. For all three media type, ~12 aggregates of size larger than 8  $\mu\text{m}$  per 1,000 cells are observed at pH 3.2. The decrease in  $N_{\text{Agg}48}$  may mean that cellular aggregates are aggregating, thereby decreasing their number. Yet,  $N_{\text{Agg}8}$  does not strongly increases because many small aggregates may become one larger aggregate. Overall, the evolution of both  $N_{\text{C}8}$  and  $N_{\text{Agg}8}$  as compared to  $N_{\text{C}48}$  and  $N_{\text{Agg}48}$  confirms the merging

23 of the small aggregates into bigger ones at  $\text{pH} \leq 3.2$ , 5 and 7, for water at low and high salt  
24 concentrations and for Nutrient broth, respectively.

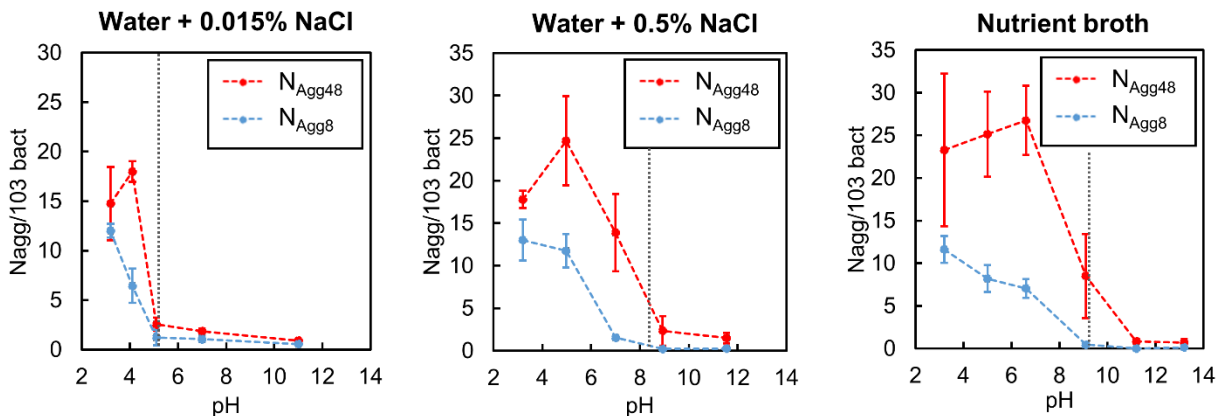

25  
26 **Fig. S1. Frequency and distribution of aggregates.** Number of aggregates of size 4 to 8  $\mu\text{m}$   
27 ( $N_{\text{Agg}48}$ ) and above 8  $\mu\text{m}$  ( $N_{\text{Agg}8}$ ) per 1,000 cells as a function of pH in water with 0.015% and  
28 0.5 % NaCl and in Nutrient broth. The dashed line corresponds to  $\text{pH}_{\text{Agg}}$ .

### 30 Cell surface hydrophobicity assay

31 Cell hydrophobicity was measured by following the standard bacterial adherence to hydrocarbons  
32 (BATH) test in which the hydrophobicity is estimated by comparing the optical density of a  
33 bacterial suspension before and after mixing with hydrocarbons. The overnight culture was washed  
34 twice by centrifugation (Allegra 64 R Centrifuge) at 10,000 rpm for 10 min and the resulting pellets  
35 were re-suspended in either water or in water containing 0.5 % NaCl to an  $\text{OD}_{600\text{nm}}$  of 0.3. The  
36 bacterial suspensions were then pH adjusted with either HCl or NaOH. Sterile water was used as  
37 a negative control, and the optical density at 600 nm was measured as  $\text{OD}_0$ . Subsequently, a 2 mL  
38 cell suspension was mixed with a 1.2 mL of octane by mixing for 1 min (vortex), and the mixture  
39 was then left to phase separate for 10 min. The  $\text{OD}_{600\text{nm}}$  value of the aqueous phase was determined

40 as  $OD_1$ . The hydrophobicity percentages were calculated by the following equation:  
41 hydrophobicity (%) =  $(1 - OD_1/OD_0) \times 100\%$ . All experiments were executed only once.

42 The cell hydrophobicity was measured in the pH range of 3 to 13 in increments of 2 pH units. Fig.  
43 S2 summarizes the results obtained in all three media type. Fig. S2 (a) shows an optical microscope  
44 image (Leica SP8) of hydrophobic *S. aureus* adsorbed onto oil droplets in (i) water, (ii) water with  
45 0.5% NaCl and (iii) in Nutrient broth at pH 7. *S. aureus* was found to be highly hydrophobic in  
46 both water and water containing NaCl ( $88 < \text{Hydrophobicity (\%)} < 100$ , Fig. S2 (b) and (c)). The  
47 hydrophobicity of *S. aureus* in full broth could not be measured due to interferences from broth  
48 components (potentially due to adsorption of proteins on the oil droplets). Nevertheless, the  
49 possible interactions (adsorption, ionic interactions...) of the broth proteins with the *S. aureus* cells  
50 surface at different pH values and their consequences on the cell hydrophobicity were briefly  
51 explored. An aliquot of 10 ml of the overnight culture was pH adjusted first and then re-suspended  
52 in water containing 0.5 wt% NaCl with two wash steps to a final  $OD_{600nm}$  of 0.3. The results  
53 presented in Fig. S2 (c) do not show any impact of pH adjustment pre-centrifugation on the final  
54 bacterial hydrophobicity: *S. aureus* remained highly hydrophobic.

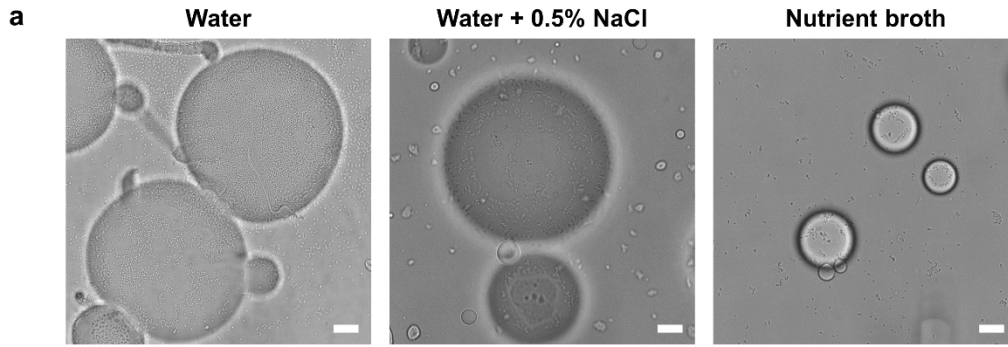

**b**

| pH                          | 3.0        | 5.2 | 7.0 | 8.7 | 11.1        | 12.8       |
|-----------------------------|------------|-----|-----|-----|-------------|------------|
| Hydrophobicity (%) in water | 100 +/- 12 |     |     |     | 87.9 +/- 12 | 100 +/- 12 |

| pH                                                                       | 3.2        | 4.9 | 7.0 | 9.0 | 11.3 | 12.9 |
|--------------------------------------------------------------------------|------------|-----|-----|-----|------|------|
| Hydrophobicity (%) in water + 0.5% NaCl pH adjusted after centrifugation | 100 +/- 12 |     |     |     |      |      |

| pH                                                                        | 3.4        | 7.0 | 9.5 |
|---------------------------------------------------------------------------|------------|-----|-----|
| Hydrophobicity (%) in water + 0.5% NaCl pH adjusted before centrifugation | 100 +/- 12 |     |     |

55

56

57 **Fig. S2. *S. aureus* cells are hydrophobic regardless of pH or salt concentration. a**, Image of *S.*

58 *aureus* cells adsorbed onto octane droplets at pH 7 when hydrophobicity test was performed in

59 water, water with 0.5% NaCl and Nutrient broth. Each scale bar is 10  $\mu$ m. **b**, Hydrophobicity of *S.*

60 *aureus* in water and water with 0.5% NaCl - pH adjusted after and before centrifugation as a

61 function of pH.

62

### 63 **Modeling of *S. aureus* aggregation**

64 The aggregation curves of the bacteria are modeled in two steps. In a first step, an extended DLVO<sup>1</sup>

65 (XDLVO) model is used to determine the minimum of interaction energy between two bacterial

66 cells, which—for the sake of simplicity- were assumed to be spherical. Once the minimum of

67 interaction energy was determined, the Smoluchowsky equation was used to compute the fraction  
 68 of a singlet cell population. The two steps are described in the following sections.

69 The diameter of *S. aureus* was estimated from SEM images and was set to 675 nm (see GraphS1).

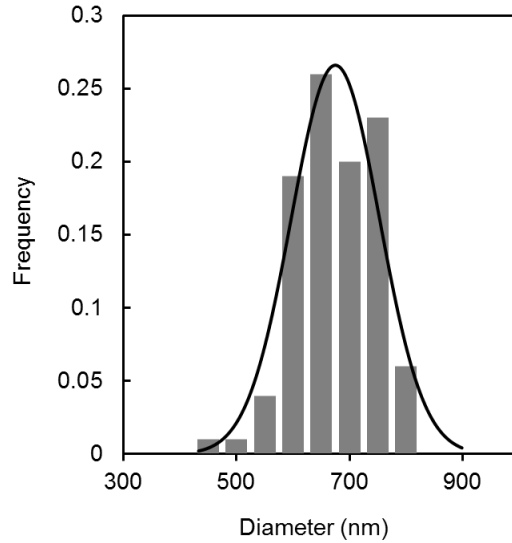

70  
 71 **GraphS1:** Histogram and Gaussian fit of the diameter of *S. aureus* cells as measured from SEM  
 72 images.

73  
 74 XDLVO: The extended DLVO model is based on the seminal model for studying the aggregation  
 75 of spherical colloids. In the DLVO model, two main interactions potential are considered: the Van  
 76 der Waals interaction energy (VdW) and the electrostatic repulsion interaction. The expression for  
 77 the VdW energy between two spheres of radius  $a$ , is shown in equation (1)<sup>1</sup>:

$$78 \quad E_{vaw} = -\frac{A}{6} \left( \frac{2a^2}{D(4a+D)} + \frac{2a^2}{(2a+D)^2} + \ln \left( \frac{D(4a+D)}{(2a+D)^2} \right) \right), \quad (1)$$

79 where  $D$  is the distance between the two surfaces of the spherical bacteria and  $A$  is the Hamaker  
 80 constant (in J). The expression for  $A$  for two colloids of index  $n_1$  and electric susceptibility  $\epsilon_1$  is a  
 81 medium of index  $n_2$  and electric susceptibility  $\epsilon_2$  (see equation (2)):

82 
$$A = \frac{3}{4}kT \left( \frac{(\varepsilon_1 - \varepsilon_2)^2}{(\varepsilon_1 + \varepsilon_2)^2} \right) + \frac{3I}{16\sqrt{2}} \left( \frac{(n_1^2 - n_2^2)^2}{(n_1^2 + n_2^2)^{\frac{3}{2}}} \right), \quad (2)$$

83 where  $I$  is the ionization potential for the media (typically  $\sim 2.10^{-18}\text{J}$ )<sup>1</sup>. Here for bacteria in aqueous  
 84 solutions, we took  $n_1 = 1.388^2$ , and  $n_2 = 1.33$  for water,  $e_1 = 1.9265$  and  $e_2 = 1.7689$ . The weak  
 85 index mismatch between bacteria and the aqueous solution results in a weak Hamaker constant  
 86  $\sim 9.33 \cdot 10^{-22}\text{J}$ . The VdW interaction is attractive and often responsible for irreversible aggregation  
 87 of colloids in solution.

88 Still, colloids like bacteria in solution do not always aggregate. Colloids often have charges on the  
 89 surface which creates an electrostatic repulsive energy. The expression for the electrostatic  
 90 repulsive energy is shown in equations (3) and (4)<sup>3</sup>:

91 
$$E_{el} = 2\pi\varepsilon\psi_0^2 a \frac{2a}{2a+D} \exp(-\kappa D) \text{ for } \kappa a < 5, \quad (3)$$

92 and

93 
$$E_{el} = 2\pi\varepsilon\psi_0^2 a \ln(1 + \exp(-\kappa D)) \text{ for } \kappa a > 5, \quad (4)$$

94

95 Where  $\varepsilon$  is the electric susceptibility of the medium,  $\psi_0$  is the surface potential of particles and  $\kappa$   
 96 is the Debye screening length. For z-z electrolyte, the expression of  $\kappa$  shown in equation (5) is:

97 
$$\kappa = \left( \frac{\varepsilon k T}{2z^2 e^2 n_b} \right)^{-\frac{1}{2}}, \quad (5)$$

98 where  $k$  is the Boltzman constant,  $T$  is the temperature and  $n_b$  is the number density of ions. In a  
 99 DLVO model, the interaction energy between two colloids is basically the sum of these two  
 100 interaction energies  $E_{el} + E_{vdw}$ . Depending on the parameter values, colloids can lower their energy  
 101 by sitting in a potential well in the pair interaction.

102 For bacteria, other types of interaction potential can be added to these two interactions, thus  
 103 forming the so-called extended DLVO (XDLVO)<sup>1,4</sup>. Several types of interactions can be added  
 104 such as repulsive hydrophilic or attractive hydrophobic interactions<sup>1,3,4</sup> or sterical short-range  
 105 interactions due to polymers or proteins located on the bacterial membrane<sup>4</sup>. Here we have added  
 106 two types of interactions, (i) an attractive hydrophobic  $E_{hyd}$  based on the fact that we measured *S.*  
 107 *aureus* to be hydrophobic and (ii) some short range sterical repulsive interaction  $E_{ster}$  based on the  
 108 fact that we observed reversible aggregation of bacteria. The expression we choose for  $E_{hyd}$  is  
 109 shown in equation (6)<sup>1</sup>:

$$110 \quad E_{hyd} = -\alpha kT \exp\left(-\frac{D}{\lambda}\right), \quad (6)$$

111 where  $\lambda$  is a characteristic length usually of the order of 0.5 to 2 nm and  $a$  is the amplitude of the  
 112 interaction at close contact in units of  $kT$ .

113 For the repulsive sterical interactions, we choose the expression shown in equation (7) for the  
 114 energy:

$$115 \quad E_{ster} = kT \frac{100aL^2}{\pi} \Gamma^{3/2} \exp(-\pi D/L), \quad (7)$$

116 where  $L$  is the thickness of the polymer on the bacteria and  $\Gamma$  is the polymer density ( $\text{m}^{-2}$ ) at the  
 117 surface.

118 In the XDLVO model, the total pair interaction energy is the sum  $E_{VDW} + E_{el} + E_{hyd} + E_{ster}$ . For a  
 119 certain set of parameter, we can compute the minimum of energy of the pair interaction energy  
 120  $E_{min}$ . Provided that  $E_{min}$  is known, we can calculate the fraction  $f$  of colloids/bacteria that will be  
 121 suspended in solution. The way to calculate  $f$  has been described in details in<sup>5,6</sup>. To summarize, by  
 122 considering the following equilibrium reaction:

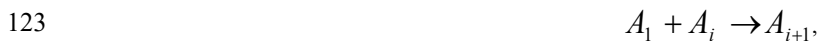

124 where  $A_i$  is an aggregate of size  $i$ , one can construct a constant of reaction  $K$  (see equation (8)):

$$125 \quad K = \frac{C_{A_{i+1}}}{C_1 C_{A_i}} \approx V \exp\left(-\frac{z/2 E_{\min}}{kT}\right), \quad (8)$$

126 where  $V$  is the volume over which bacteria interact  $V \sim 10^{-21} \text{m}^3$ ,  $z$  is the number of interacting  
127 neighbor in an aggregate  $z \sim 6$  and  $C_i$  the concentration of aggregates of size  $i$ . Once  $K$  is calculated,  
128 the fraction of bacteria remaining suspended in solution can be calculated (see equation (9))<sup>6</sup>:

$$129 \quad f = \frac{1 + 2KC - \sqrt{1 + 4KC}}{2K^2 C^2}, \quad (9)$$

130 where  $C$  is the total concentration of bacteria. Once  $f$  is calculated the percentage of bacteria in  
131 aggregates as shown in Fig. 1 (B) is  $100(1-f)$ .

132

133 We used this model to adjust these four unknown parameters,  $a$ ,  $\lambda$ ,  $\Gamma$  and  $L$  by fitting the  
134 aggregation curve for water with salt at 85 mM. The best fitting parameters are  $a = 36.5$ ,  $\lambda = 1.8$   
135 nm,  $\Gamma = 4.10^{16}/\text{m}^2$  and  $L = 1.61$  nm. These results have order of magnitudes in agreement with those  
136 reported in the literature<sup>4</sup>.

137

138 This model may find its use in predicting the effect of bacterial concentration and temperature on  
139 the aggregation in *S. aureus* in water with 0.5% salt (see Fig. S3 (c-d)). The concentration of  
140 bacteria had a large impact on aggregation. On the contrary, temperature seems to have a minor  
141 impact on aggregation within the time frame of our experiments. Based on these results, bacterial  
142 concentration is very likely to affect the time-to-kill values of QACs whereas temperature is not.



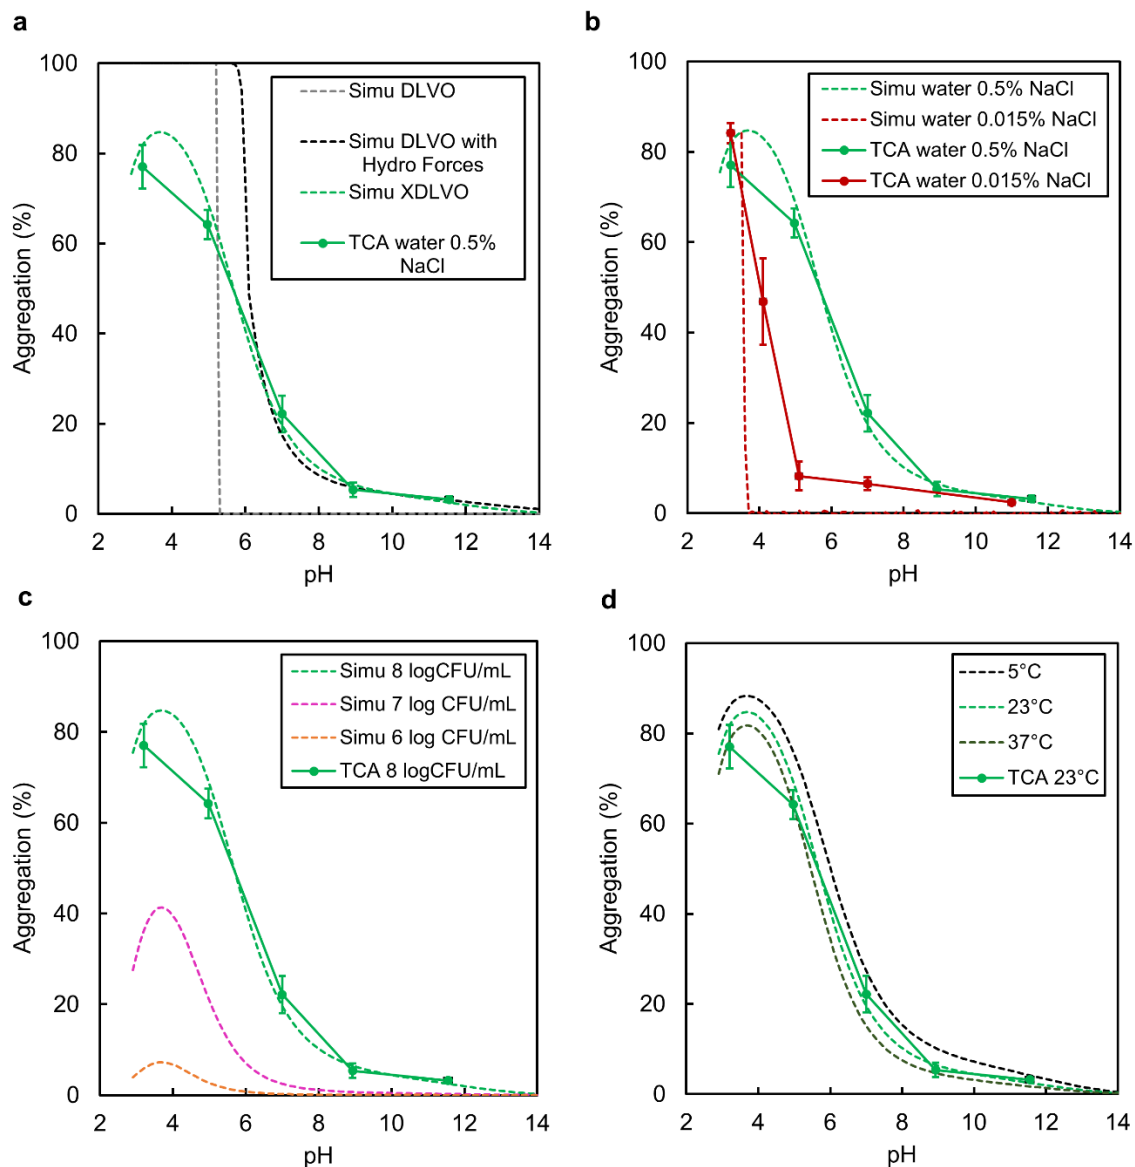

143  
 144 **Fig. S3. Simulation of the percent of cell aggregated using the XDLVO model.** Simulations  
 145 (dotted lines) and experimental (solid lines) aggregation of *S. aureus* in **a**: water with 0.5% NaCl  
 146 (the XDLVO model encompasses hydrophobic forces and short range repulsion), **b**: water with  
 147 0.015% or 0.5% NaCl, **c**: water with 0.5% NaCl as a function of the bacteria concentration, **d**:  
 148 water containing 0.5% NaCl as a function of the temperature. Except stated otherwise, NaCl  
 149 concentration is 0.5%, temperature is 23°C, the bacterial diameter is set to 675 nm and the bacterial  
 150 concentration is set to 8 log<sub>10</sub>CFU/mL.

151 **Charge and size of proteins contained in Nutrient broth**

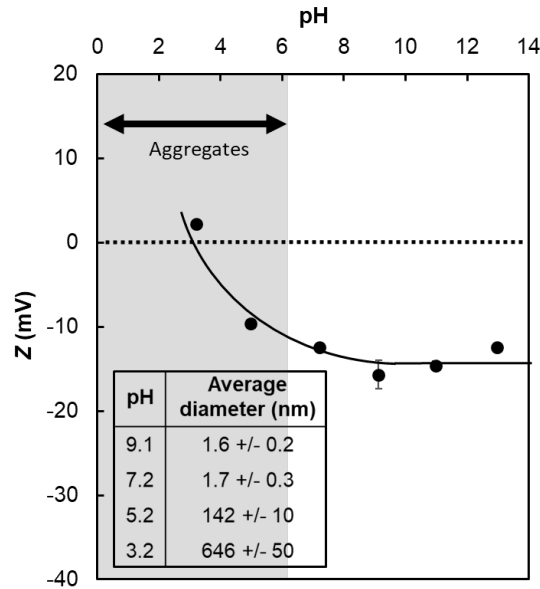

152

153 **Fig. S4. Charge-mediated aggregation of the proteins in Nutrient broth as pH is decreased.**

154 Overall charge of proteins contained in Nutrient broth as a function of pH. Table in insert is the  
 155 average diameter (in Number) of the proteins aggregates as a function of pH. As pH decreases the  
 156 size of proteins increases, implicating a protein-protein aggregation. Concomitantly, as pH  
 157 decreases, the charge of proteins decreases therefore suggesting a charge-mediated aggregation  
 158 triggered by pH change. The black line is to provide visual guidance for readers. The aggregation  
 159 and loss of charge of proteins could favor depletion and/or bridging of bacterial cells<sup>7</sup>, thus  
 160 promoting an increase in cell aggregation.

161 Regarding cell bridging, we hypothesize that proteins contained in Nutrient broth (peptone,  
 162 beef extract) might become slightly positively charged at low pH due to protonation of both  
 163 carboxylic and primary amine groups. By becoming more positively charged, the proteins might  
 164 bridge negatively charged bacteria, hence enhance the cell aggregation<sup>7</sup>.

165

166 **Modeling of *S. aureus* aggregation: Effect of bacterial concentration in Nutrient broth**

167 In Nutrient broth, where additional forces play a role in the aggregation of bacteria, the effect of  
168 bacteria concentration can be estimated by computing the minimum of energy. We can  
169 approximate the minimum of energy by solving numerically the equation (10) relating the fraction  
170 of singlets  $f$  to the constant of association  $K$  at the six different pH values used in the experiments  
171 (Fig. 1) for a known concentration  $C=10^8$  bacteria /mL:

172 
$$f(pH) = \frac{1 + 2K(pH)C - \sqrt{1 + K(pH)C}}{2K(pH)^2 C^2}, \quad (10)$$

173 Since the minimum of energy does not depend on concentration but on the surface-surface  
174 interactions between bacteria, once the constant  $K$  is numerically found, we can recalculate the  
175 fraction of singlet for different concentrations at the same six different values of pH. Results are  
176 shown in Fig. S5 for different bacteria concentration in Nutrient broth. The aggregation of the cells  
177 decreases with the decrease of the bacterial concentration.

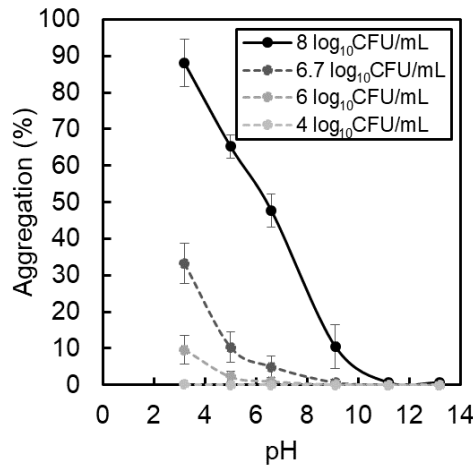

178  
179 **Fig. S5. Decrease of the percent of aggregated cell due to the decrease of the bacterial**  
180 **concentration in Nutrient broth.** Simulations (dotted lines) and experimental (solid lines)  
181 aggregation of *S. aureus* in Nutrient broth at different concentrations of bacteria.

182

183 Since about 7 log<sub>10</sub>CFU/mL of *S. aureus* were not fully killed within 10 min with 20 ppm DDAC  
 184 (pH ≤ 5), we predict that *S. aureus* at 8 log<sub>10</sub>CFU/mL aggregated in larger proportion, will require  
 185 more than 10 min for full kill with DDAC at or below 20 ppm for similar pH values. Similarly,  
 186 time-to-kill in the order of 30 s might be achieved with bacteria at 8 log<sub>10</sub>CFU/mL in Nutrient  
 187 broth at pH > 11 when the aggregation is below 10%.

188

189 **Antimicrobial culture assay**

| pH   | Contact time | Replicate 1 | Replicate 2 | Replicate 3 |
|------|--------------|-------------|-------------|-------------|
| 3.1  | 30 sec       | Very turbid |             |             |
|      | 1 min        |             |             |             |
|      | 3 min        |             |             |             |
|      | 5 min        |             |             |             |
|      | 10 min       |             |             |             |
| 5.0  | 30 sec       | Very turbid |             |             |
|      | 1 min        |             |             |             |
|      | 3 min        |             |             |             |
|      | 5 min        |             |             |             |
|      | 10 min       |             |             |             |
| 6.5  | 30 sec       | Very turbid |             |             |
|      | 1 min        |             |             |             |
|      | 3 min        |             |             |             |
|      | 5 min        |             |             |             |
|      | 10 min       |             |             |             |
| 9.2  | 30 sec       | Very turbid |             |             |
|      | 1 min        |             |             |             |
|      | 3 min        | Turbid      | Turbid      | Clear       |
|      | <b>5 min</b> | Clear       |             |             |
|      | 10 min       |             |             |             |
| 11.0 | 30 sec       | Very turbid |             |             |
|      | 1 min        | Very turbid | Turbid      | Turbid      |
|      | <b>3 min</b> | Clear       |             |             |
|      | 5 min        |             |             |             |
|      | 10 min       |             |             |             |

190

191 **Table S1. Time-to-kill for 2 ppm of DDAC.** The minimum time required to deactivate the

192 entire *S. aureus* culture (in bold) upon 10 min exposure to [DDAC] = 2 ppm at different pH

193 values.

| pH   | Contact time  | Replicate 1 | Replicate 2 | Replicate 3 |
|------|---------------|-------------|-------------|-------------|
| 3.1  | 30 sec        |             | Very turbid |             |
|      | 1 min         |             |             |             |
|      | 3 min         |             |             |             |
|      | 5 min         |             |             |             |
|      | 10 min        |             |             |             |
| 5.0  | 30 sec        |             | Very turbid |             |
|      | 1 min         |             |             |             |
|      | 3 min         |             |             |             |
|      | 5 min         |             |             |             |
|      | 10 min        |             |             |             |
| 6.5  | 30 sec        |             | Very turbid |             |
|      | 1 min         |             |             |             |
|      | <b>3 min</b>  |             | Clear       |             |
|      | 5 min         |             |             |             |
|      | 10 min        |             |             |             |
| 9.2  | <b>30 sec</b> |             | Clear       |             |
|      | 1 min         |             |             |             |
|      | 3 min         |             |             |             |
|      | 5 min         |             |             |             |
|      | 10 min        |             |             |             |
| 11.0 | <b>30 sec</b> |             | Clear       |             |
|      | 1 min         |             |             |             |
|      | 3 min         |             |             |             |
|      | 5 min         |             |             |             |
|      | 10 min        |             |             |             |

194

195 **Table S2. Time-to-kill for 20 ppm of DDAC.** The minimum time required to deactivate the  
196 entire *S. aureus* culture (in bold) upon 10 min exposure to [DDAC] = 20 ppm at different pH  
197 values.

198

| pH   | Replicate 1                   | Replicate 2 | Replicate 3 | Average log <sub>10</sub> CFU/mL |
|------|-------------------------------|-------------|-------------|----------------------------------|
| 3.1  | All solutions are very turbid |             |             | 6.7                              |
| 5.0  |                               |             |             | 6.8                              |
| 6.5  |                               |             |             | 6.7                              |
| 9.2  |                               |             |             | 6.6                              |
| 11.0 |                               |             |             | 6.6                              |

199

200 **Table S3. Impact of pH on *S. aureus* viability for a contact time of 10 min.** No decrease in  
201 viability is observed for the pH range 3 to 11.

202 **References**

- 203 1. Leckband, D., Israelachvili, J., Intermolecular forces in biology. *Q. Rev. Biophys.* **34**, 105–267  
204 (2001).
- 205 2. Liu, P.Y. *et al.* Real-time measurement of single bacterium's refractive index using optofluidic  
206 immersion refractometry. *Procedia Eng.* **87**, 356 – 359 (2014).
- 207 3. Kovalchuk, N. M., Starov, V. M. Aggregation in colloidal suspensions: Effect of colloidal  
208 forces and hydrodynamic interactions, *Adv. in Colloid Interface Sci.* **179**, 99-106.
- 209 4. Dorobantu, L. S., Bhattacharjee, S., Foght, J. M., Gray, M. R. Analysis of Force Interactions  
210 between AFM Tips and Hydrophobic Bacteria Using DLVO Theory, *Langmuir* **25**, 6968–6976  
211 (2009).
- 212 5. Dreyfus, R. *et al.* Simple quantitative model for the reversible association of DNA coated  
213 colloids. *Phys. Rev. Lett.* **102**, 048301 (2009).
- 214 6. Dreyfus, R. *et al.* Aggregation-disaggregation transition of DNA-coated colloids: Experiments  
215 and theory. *Phys. Rev.E* **81**, 041404 (2010).
- 216 7. Trunk, T., Khalil, H. S. and Leo, J. C. Bacterial autoaggregation. *AIMS Microbiol.* **4**, 140–164  
217 (2018).

218
